# Supplementary material for: State-of-the-Art of Profiling Immune Contexture in the Era of Multiplexed Staining and Digital Analysis to Study Paraffin Tumor Tissues
Source: MDPI journal article supplement (doi:10.3390/cancers11020247), 2019-02-20
Supplement: s1 [file s1]

# Supplementary Materials: State-of-the-Art of Profiling Immune Contexture in the Era of Multiplexed Staining and Digital Analysis to Study Paraffin Tumor Tissues

Edwin Roger Parra, Alejandro Francisco-Cruz, Ignacio Ivan Wistuba

**Table S1.** Multiplex image acquisition products.

| Company                | Imaging Modality                         | Image Acquisition Instrument | Image Extraction | Image Resolution                                                                                              |
|------------------------|------------------------------------------|------------------------------|------------------|---------------------------------------------------------------------------------------------------------------|
| Olympus                | BF                                       | Olympus VS120-L-110W         | WS               | 20× (0.33 µm/pixel) and 40× (0.17 µm/pixel)                                                                   |
| Nikon                  | BF                                       | Eclipse Ci-E                 | WS               | 20× (0.32 µm/pixel) and 40× (0.16 µm/pixel)                                                                   |
| Keyence                | FL                                       | BZ-X710                      | ROI              | 40× oil immersion (0.188 µm/pixel)                                                                            |
| Hamamatsu              | BF, FL                                   | NanoZoomer S60               | WS               | 20× (0.46 µm/pixel), and 40× (0.23 µm/pixel)                                                                  |
| Zeiss                  | BF, FL                                   | AxioVision MosaiX            | WS               | 5× (2.11 µm/pixel), 10× (1.05 µm/pixel), and 20× (0.53 µm/pixel)                                              |
| Olympus America        | BF, FL                                   | VS110                        | WS               | 20× (0.46 µm/pixel), and 40× (0.23 µm/pixel)                                                                  |
| Akoya /PerkinElmer     | BF, FL                                   | Vectra/Polaris               | ROI              | 10× (1.0 µm/pixel), 20× (0.5 µm/pixel), and 40× (0.25 µm/pixel)                                               |
| Leica Biosystems       | FL                                       | Aperio IF                    | WS               | 20× (0.25 µm/pixel) and 40× (0.50 µm/pixel)                                                                   |
| Ventana/Roche          | BF, FL                                   | iScan                        | WS               | 4× (2.27 µm/pixel), 20× (0.908 µm/pixel), 20× (0.454 µm/pixel) and 40× (0.2227 µm/pixel)                      |
| 3DHistech              | BF, FL                                   | Pannoramic/250 FLASH III     | WS               | 30× (0.32 µm/pixel) and 60× (0.16 µm/pixel)                                                                   |
| Huron Technologies     | BF, FL                                   | TISSUEScope 4000             | WS               | 20× (0.4 µm/pixel) and 40× (0.2 µm/pixel)                                                                     |
| MetaSystems            | BF, FL                                   | Metafer                      | WS               | 20× (0.46 µm/pixel), and 40× (0.23 µm/pixel)                                                                  |
| MikroScan Technologies | BF, FL                                   | MikroScan                    | WS               | 2× (4.54 µm/pixel), 4× (2.27 µm/pixel), 10× (0.9087 µm/pixel), 20× (0.454 µm/pixel), and 40× (0.227 µm/pixel) |
| TissueGnostics         | BF, FL                                   | TissueFAXS                   | WS               | 10× to 100× (4.25µm µm/pixel)                                                                                 |
| Bruker                 | Metal tag spectra captured based on mass | MALDI-TOF                    | ROI              | ~200 nm                                                                                                       |
| IONPATH                | Metal tag spectra captured based on mass | MIBIScope-I                  | ROI              | FOV 1 mm <sup>2</sup> , ≥1 mm <sup>2</sup> /2 hr, 250 nm                                                      |
| FLUIDIGM               | Metal tag spectra captured based on mass | Helios/CyTOF                 | ROI              | FOV >= 250 µm × 250 µm, ≥1 mm <sup>2</sup> /2 hr, 200 pixels/sec, 1000 nm                                     |

Note: BF = Bright Field, FL = Fluorescence, FOV = Field of view, WS = Whole Section, ROI = Region of Interest.
